# Supplementary material for: Integrative transcriptome, proteome, phosphoproteome and genetic mapping reveals new aspects in a fiberless mutant of cotton
Source: PubMed Central journal article supplement (PMC4830928; doi:10.1038/srep24485), 2016-04-14
Supplement: srep24485-s1.pdf [file srep24485-s1.pdf]

Supplementary Information

**Integrative transcriptome, proteome, phosphoproteome and genetic mapping  
reveals new aspects in a fiberless mutant of cotton**

Qi-Feng Ma<sup>1</sup>, Chun-Hui Wu<sup>1</sup>, Man Wu<sup>1</sup>, Wen-Feng Pei<sup>1</sup>, Xing-Li Li<sup>1</sup>, Wen-Kui  
Wang<sup>1</sup>, Jinfu Zhang<sup>2,\*</sup>, Ji-Wen Yu<sup>1,\*</sup>, and Shu-Xun Yu<sup>1,\*</sup>

<sup>1</sup> State Key Laboratory of Cotton Biology, Institute of Cotton Research of CAAS,  
Anyang, Henan 455000, China

<sup>2</sup> Department of Plant and Environmental Sciences, New Mexico State University,  
Las Cruces, NM 88003, USA

\* To whom correspondence should be addressed: No. 38, Institute of Cotton Research  
of CAAS, Huanghe Rd., Anyang, Henan 455000, P.R. China, Tel: +86-372-2562275,  
Fax: +86-372-2562201, Email: ysx195311@163.com

## Supplementary figure and table legends

**Supplementary Fig. S1.** The experimental workflow in this study. WT -3 DPA and WT 0 DPA: -3-DPA and 0-DPA ovules from WT. *fl* -3 DPA and *fl* 0 DPA: -3-DPA and 0-DPA ovules from *fl* mutant. Bars: 200  $\mu\text{m}$  in WT -3 DPA and *fl* -3 DPA; 20  $\mu\text{m}$  in WT 0 DPA and *fl* 0 DPA.

**Supplementary Fig. S2.** Alternative splicing events in the common genes between DEGs and DEPs. Yellow bar illustrated the gene sequences same as the cotton genome annotated genes. Blue bar indicated sequences different from the annotated genes in the WT. Red bar indicated sequences different from the annotated genes in the *fl*.

**Supplementary Fig. S3.** comparison of phosphosites between CotAD\_44282 and homologs in other species.

**Supplementary Fig. S4.** Phosphoraylation motifs between all phosphosites (a) and differential phosphosites (c). (b, d) Top five phosphoraylation motifs.

**Supplementary Fig. S5.** Western blotting and enzymatic assay validation of selected differentially expressed proteins. (a) Western blotting of actin and PPP1CB expression between WT and *fl* at 0 DPA. (b) Enzymatic assay analysis of the G6PDH enzyme. Three biological replicates were performed. The error bars represent SD (student's t test, \*\*\* $p < 0.001$ ,  $p = 5.34\text{E-}05$  at -5 DPA stage,  $p = 0.00057$  at 0 DPA stage,  $p = 5.87\text{E-}05$  at 3 DPA stage).

**Supplementary Fig. S6.** Quantification of fatty acids of WT and *fl* ovules at -3 DPA. (student's t test, \* $P < 0.05$ , \*\* $P < 0.01$ ,  $p = 0.011$  at C16:0,  $p = 0.031$  at C18:0,  $p =$

0.0028 at C18:1,  $p = 0.0015$  at C18:2,  $p = 0.0015$  at C18:3).

**Supplementary Fig. S7.** Cotton ovule culture in vitro. Scanning electron of unfertilized ovule surface treated with (a) none, (b) 5  $\mu\text{M}$  D - fructose di-*potassium salts* of 6-*phosphorous acid*, (c) 10  $\mu\text{M}$  D-*glucose*, (d) 50  $\mu\text{M}$  dihydroquercetin. Bars = 100  $\mu\text{m}$ .

**Supplementary Table S1.** The differentially expressed genes (sheet 1-4), proteins (sheet 5-8), and phosphoproteins (sheet 9-12) list. A, Xuzhou 142 WT -3 DPA ovules; B, Xuzhou 142 WT 0 DPA ovules; C, Xuzhou 142 *fl* -3 DPA ovules; D, Xuzhou 142 *fl* 0 DPA ovules.

**Supplementary Table S2.** A complete list of detected genes (sheet 1), proteins (sheet 2), and phosphoproteins (sheet 3).

**Supplementary Table S3.** The previously reported genes, proteins and phosphoproteins.

**Supplementary Table S4.** Protein-protein interaction network.

**Supplementary Table S5.** Phosphorylation motifs distribution between the phosphorylated protein (sheet 1-2) and the differentially phosphorylated protein (sheet 3-4).

**Supplementary Table S6.** Differentially phosphorylated protein motifs identified in this study.

**Supplementary Table S7.** The primer sequences list and gene expression profiles following RNA-Seq and qRT-PCR.

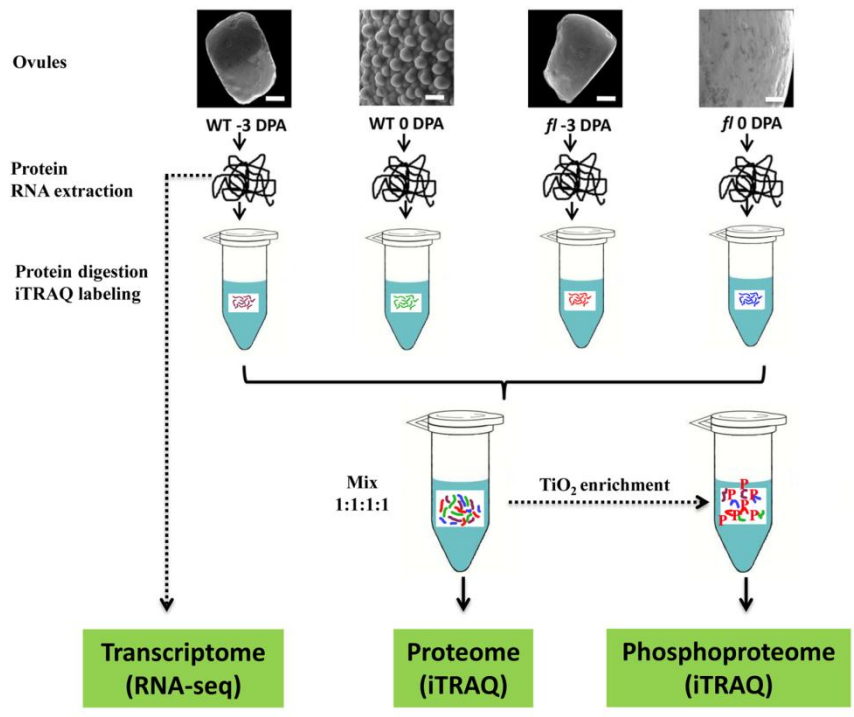

**Supplementary Fig. S1.** The experimental workflow in this study. WT -3 DPA and WT 0 DPA: -3-DPA and 0-DPA ovules from WT. *fl* -3 DPA and *fl* 0 DPA: -3-DPA and 0-DPA ovules from *fl* mutant. Bars: 200  $\mu$ m in WT -3 DPA and *fl* -3 DPA; 20  $\mu$ m in WT 0 DPA and *fl* 0 DPA.

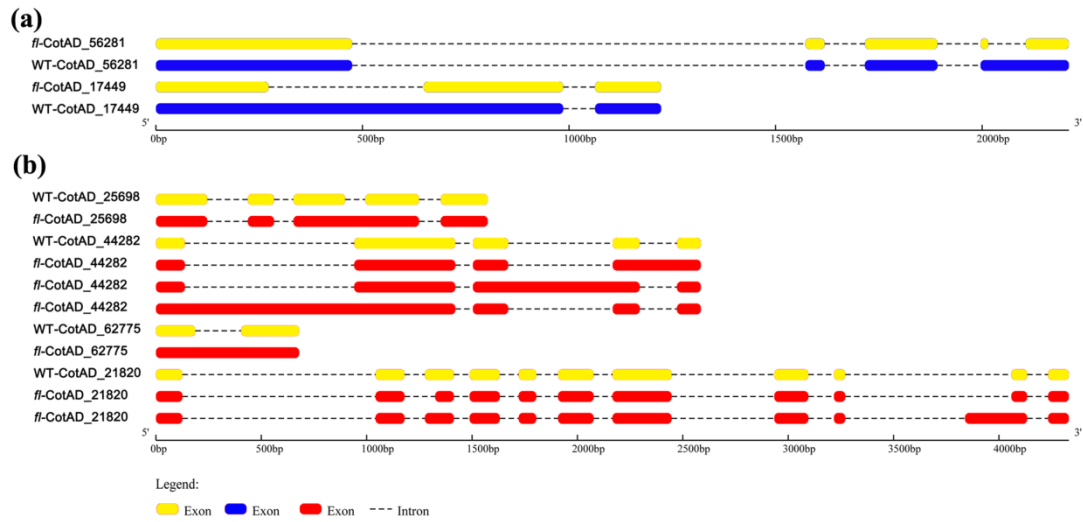

**Supplementary Fig. S2.** Alternative splicing events in the common genes between DEGs and DEPs. Yellow bar illustrated the gene sequences same as the cotton genome annotated genes. Blue bar indicated sequences different from the annotated genes in the WT. Red bar indicated sequences different from the annotated genes in the *fl*.

```

CotAD_44282 1 -MLMSRALSRVSKRVGARSLLL---SAPKSFQSPSLSTQFHSLVSESPNKVITNDVCLLQNSNLHWNFRFRFGISSASAP
P3DB-13491 1 -----MEFLSTSMIAA---EAEEYSRSGHNSTHLP-----VQVNFCLCPSINS-----STSKFGFSSASV
P3DB-5227 1 MAAAARLLARISRQGVASAAAARRQAEAAALLGASAGRHLAPPCSSIKALPLLNQPRLYSTS-----TFQRFSGFSSSAP-

CotAD_44282 77 EPSEKEHGSVDN---NGQDPVKPSED---TIPGEAEATKESG-FNSESQNAMPQSDKRRRKAARKRTAFSDSDESDDG
P3DB-13491 54 ETEGKE-GNNVHNGNFTSADPAKTSEEAEEIDQPGQAKSADQTEESGSIADSHSQTVKRRRRSIKRTAFSDSDESSED
P3DB-5227 75 QQDDKAANKQTEDGVNKSTQSEASNETN---SSPG-TENASQAG-----SQDSVPQS-NRRRRGTKRTAFSDSDTE-DLD

CotAD_44282 149 LSMADLVKLVEEKEELLKTKQTEIEQMKDKVVRTLAEMENVMARTRREAENSKKFAIQNFVKGLLDVADNLGRASTHVKG
P3DB-13491 133 LSRDDLKLVAEKEELLKLLKKEIEKMQDKVLRTYAEMENVMDRTRREAENSRKFAIQNFAKSLLDVADNLGRASSVVK
P3DB-5227 144 LSKEDLTKLVLEKEELLKSKDEEVKMDKVLRSYAEMENVIARTKRESNKKYAVQGFSSKSLLDVADNLSRASSVVK

CotAD_44282 229 SFSKIDESND-TAGAVPLLKTLLEGVEMTEKQLGEVFRKFGVEKFDPTNEPFDPHRHNAVFQVPDNSKPPGTVAHVVKAG
P3DB-13491 213 SFSKIDTSSDSSAEAVKLLKTLLEGVEMTEKQLSEALKKFGVEKFDPTNEPFDPHRHNAVFQVPDGSKPPGTVAAVLKAG
P3DB-5227 224 SFSKIDTSNE-SAEAVKLLNTLLEGVEMTEKQLGEVFKKFGVEKFDPLNEKFDPNKHAALFQIPDPSKPSGTVAHVVKV

CotAD_44282 308 YMLYDRVIRPAEVEGVTQATDDGATENNTGDKVSDA
P3DB-13491 293 YLLHDRVIRPAEVEGVTQAKENGNSAE-----
P3DB-5227 303 YMLHDRVLRPAEVEGVTTEGGPIEEPEEKSDKSD--

```

**Supplementary Fig. S3.** comparison of phosphosites between CotAD\_44282 and homologs in other species.



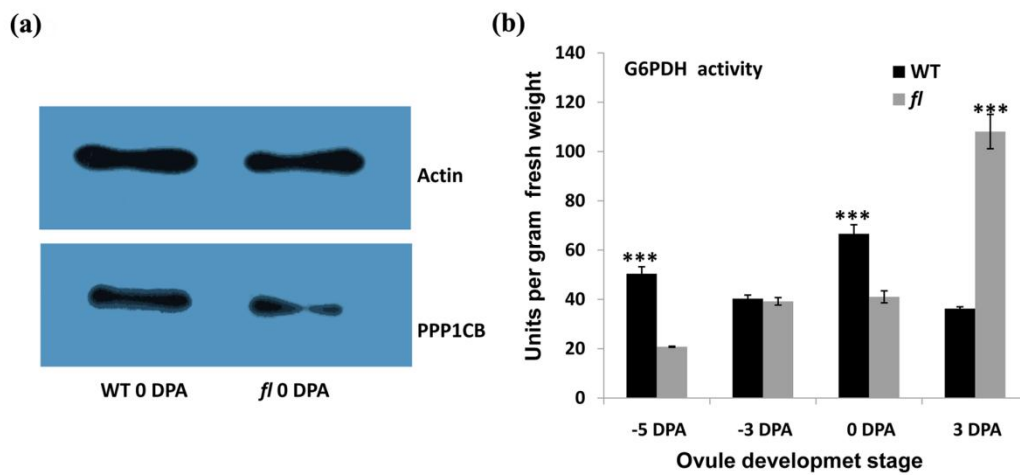

**Supplementary Fig. S5.** Western blotting and enzymatic assay validation of selected differentially expressed proteins. (a) Western blotting of actin and PPP1CB expression between WT and *fl* at 0 DPA. (b) Enzymatic assay analysis of the G6PDH enzyme. Three biological replicates were performed. The error bars represent SD (student's t test, \*\*\* $p < 0.001$ ,  $p = 5.34E-05$  at -5 DPA stage,  $p = 0.00057$  at 0 DPA stage,  $p = 5.87E-05$  at 3 DPA stage).



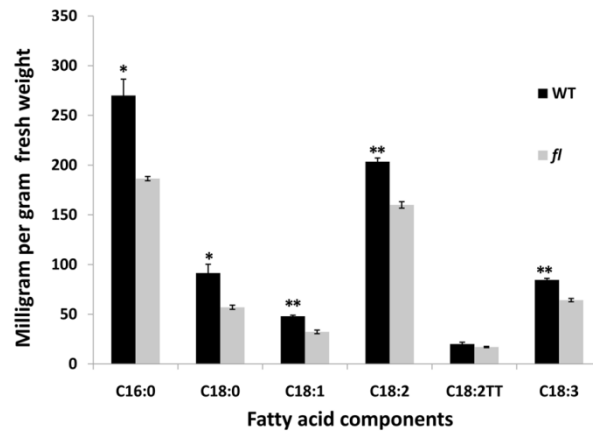

**Supplementary Fig. S6.** Quantification of fatty acids of WT and *fl* ovules at -3 DPA.

(student's t test, \*P < 0.05, \*\*P < 0.01, p = 0.011 at C16:0, p = 0.031 at C18:0, p = 0.0028 at C18:1, p = 0.0015 at C18:2, p = 0.0015 at C18:3).

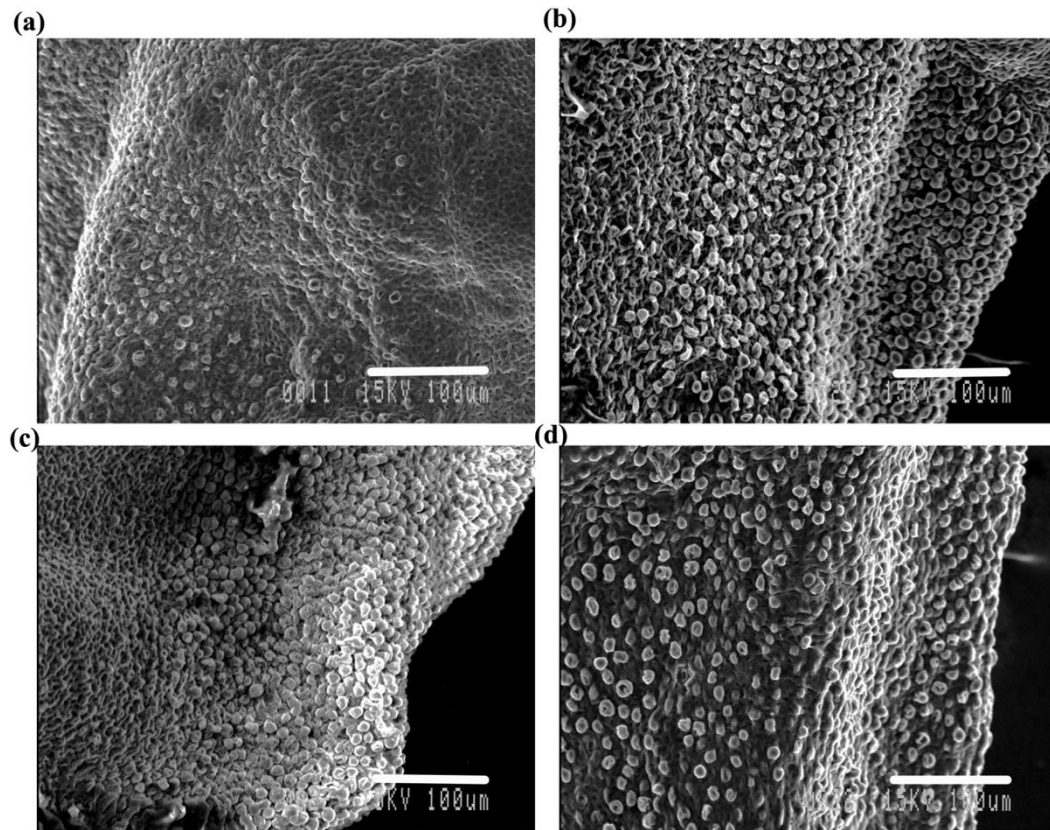

**Supplementary Fig. S7.** Cotton ovule culture in vitro. Scanning electron of unfertilized ovule surface treated with (a) none, (b) 5  $\mu\text{M}$  D - fructose di-*potassium salts of 6-phosphorous acid*, (c) 10  $\mu\text{M}$  D-*glucose*, (d) 50  $\mu\text{M}$  dihydroquercetin. Bars = 100  $\mu\text{m}$ .

**Supplementary Table S3.** The previously reported genes, proteins and phosphoproteins.

| <b>Gene list</b> | <b>Type</b>                  |
|------------------|------------------------------|
| CotAD_00199      | The previously reported gene |
| CotAD_00236      | The previously reported gene |
| CotAD_00696      | The previously reported gene |
| CotAD_00940      | The previously reported gene |
| CotAD_01748      | The previously reported gene |
| CotAD_02255      | The previously reported gene |
| CotAD_02378      | The previously reported gene |
| CotAD_02433      | The previously reported gene |
| CotAD_02553      | The previously reported gene |
| CotAD_02961      | The previously reported gene |
| CotAD_03497      | The previously reported gene |
| CotAD_04193      | The previously reported gene |
| CotAD_04477      | The previously reported gene |
| CotAD_04628      | The previously reported gene |
| CotAD_04637      | The previously reported gene |
| CotAD_05386      | The previously reported gene |
| CotAD_05977      | The previously reported gene |
| CotAD_06350      | The previously reported gene |
| CotAD_06406      | The previously reported gene |
| CotAD_06986      | The previously reported gene |
| CotAD_07026      | The previously reported gene |
| CotAD_07129      | The previously reported gene |
| CotAD_07491      | The previously reported gene |
| CotAD_07567      | The previously reported gene |
| CotAD_09649      | The previously reported gene |
| CotAD_10182      | The previously reported gene |
| CotAD_10228      | The previously reported gene |
| CotAD_10611      | The previously reported gene |
| CotAD_10936      | The previously reported gene |
| CotAD_11005      | The previously reported gene |
| CotAD_11036      | The previously reported gene |
| CotAD_12715      | The previously reported gene |
| CotAD_12781      | The previously reported gene |
| CotAD_12926      | The previously reported gene |
| CotAD_13206      | The previously reported gene |
| CotAD_13625      | The previously reported gene |
| CotAD_13946      | The previously reported gene |
| CotAD_14462      | The previously reported gene |
| CotAD_14663      | The previously reported gene |

|             |                              |
|-------------|------------------------------|
| CotAD_14769 | The previously reported gene |
| CotAD_14780 | The previously reported gene |
| CotAD_15105 | The previously reported gene |
| CotAD_15396 | The previously reported gene |
| CotAD_15507 | The previously reported gene |
| CotAD_15554 | The previously reported gene |
| CotAD_15724 | The previously reported gene |
| CotAD_16059 | The previously reported gene |
| CotAD_16314 | The previously reported gene |
| CotAD_16520 | The previously reported gene |
| CotAD_16680 | The previously reported gene |
| CotAD_16945 | The previously reported gene |
| CotAD_17026 | The previously reported gene |
| CotAD_17473 | The previously reported gene |
| CotAD_17915 | The previously reported gene |
| CotAD_18107 | The previously reported gene |
| CotAD_18860 | The previously reported gene |
| CotAD_19011 | The previously reported gene |
| CotAD_19158 | The previously reported gene |
| CotAD_19231 | The previously reported gene |
| CotAD_19591 | The previously reported gene |
| CotAD_20153 | The previously reported gene |
| CotAD_20567 | The previously reported gene |
| CotAD_21208 | The previously reported gene |
| CotAD_21924 | The previously reported gene |
| CotAD_22244 | The previously reported gene |
| CotAD_22834 | The previously reported gene |
| CotAD_23077 | The previously reported gene |
| CotAD_23731 | The previously reported gene |
| CotAD_24107 | The previously reported gene |
| CotAD_24297 | The previously reported gene |
| CotAD_24572 | The previously reported gene |
| CotAD_25082 | The previously reported gene |
| CotAD_25094 | The previously reported gene |
| CotAD_25416 | The previously reported gene |
| CotAD_25559 | The previously reported gene |
| CotAD_25698 | The previously reported gene |
| CotAD_26597 | The previously reported gene |
| CotAD_27919 | The previously reported gene |
| CotAD_27924 | The previously reported gene |
| CotAD_28784 | The previously reported gene |
| CotAD_29214 | The previously reported gene |
| CotAD_29325 | The previously reported gene |
| CotAD_30021 | The previously reported gene |

|             |                              |
|-------------|------------------------------|
| CotAD_30233 | The previously reported gene |
| CotAD_30242 | The previously reported gene |
| CotAD_30567 | The previously reported gene |
| CotAD_31283 | The previously reported gene |
| CotAD_31379 | The previously reported gene |
| CotAD_31489 | The previously reported gene |
| CotAD_31689 | The previously reported gene |
| CotAD_32299 | The previously reported gene |
| CotAD_32615 | The previously reported gene |
| CotAD_32773 | The previously reported gene |
| CotAD_32973 | The previously reported gene |
| CotAD_34067 | The previously reported gene |
| CotAD_35876 | The previously reported gene |
| CotAD_36532 | The previously reported gene |
| CotAD_36594 | The previously reported gene |
| CotAD_36667 | The previously reported gene |
| CotAD_36879 | The previously reported gene |
| CotAD_37838 | The previously reported gene |
| CotAD_38070 | The previously reported gene |
| CotAD_38156 | The previously reported gene |
| CotAD_38430 | The previously reported gene |
| CotAD_38656 | The previously reported gene |
| CotAD_40115 | The previously reported gene |
| CotAD_40215 | The previously reported gene |
| CotAD_40334 | The previously reported gene |
| CotAD_40395 | The previously reported gene |
| CotAD_41089 | The previously reported gene |
| CotAD_41275 | The previously reported gene |
| CotAD_41643 | The previously reported gene |
| CotAD_41989 | The previously reported gene |
| CotAD_42684 | The previously reported gene |
| CotAD_42828 | The previously reported gene |
| CotAD_43297 | The previously reported gene |
| CotAD_43445 | The previously reported gene |
| CotAD_44282 | The previously reported gene |
| CotAD_44359 | The previously reported gene |
| CotAD_46044 | The previously reported gene |
| CotAD_46568 | The previously reported gene |
| CotAD_46764 | The previously reported gene |
| CotAD_47132 | The previously reported gene |
| CotAD_47921 | The previously reported gene |
| CotAD_48194 | The previously reported gene |
| CotAD_48277 | The previously reported gene |
| CotAD_48384 | The previously reported gene |

|             |                              |
|-------------|------------------------------|
| CotAD_50040 | The previously reported gene |
| CotAD_50241 | The previously reported gene |
| CotAD_51014 | The previously reported gene |
| CotAD_52389 | The previously reported gene |
| CotAD_52859 | The previously reported gene |
| CotAD_53319 | The previously reported gene |
| CotAD_53565 | The previously reported gene |
| CotAD_53608 | The previously reported gene |
| CotAD_53880 | The previously reported gene |
| CotAD_53983 | The previously reported gene |
| CotAD_54337 | The previously reported gene |
| CotAD_54350 | The previously reported gene |
| CotAD_54841 | The previously reported gene |
| CotAD_54934 | The previously reported gene |
| CotAD_56911 | The previously reported gene |
| CotAD_57769 | The previously reported gene |
| CotAD_58038 | The previously reported gene |
| CotAD_58064 | The previously reported gene |
| CotAD_58358 | The previously reported gene |
| CotAD_58749 | The previously reported gene |
| CotAD_59222 | The previously reported gene |
| CotAD_60054 | The previously reported gene |
| CotAD_60970 | The previously reported gene |
| CotAD_61466 | The previously reported gene |
| CotAD_62037 | The previously reported gene |
| CotAD_62802 | The previously reported gene |
| CotAD_64148 | The previously reported gene |
| CotAD_64256 | The previously reported gene |
| CotAD_64448 | The previously reported gene |
| CotAD_66378 | The previously reported gene |
| CotAD_66643 | The previously reported gene |
| CotAD_67194 | The previously reported gene |
| CotAD_67601 | The previously reported gene |
| CotAD_68165 | The previously reported gene |
| CotAD_68168 | The previously reported gene |
| CotAD_68363 | The previously reported gene |
| CotAD_68885 | The previously reported gene |
| CotAD_69714 | The previously reported gene |
| CotAD_70161 | The previously reported gene |
| CotAD_70244 | The previously reported gene |
| CotAD_71359 | The previously reported gene |
| CotAD_71648 | The previously reported gene |
| CotAD_72400 | The previously reported gene |
| CotAD_73030 | The previously reported gene |

|                        |                                        |
|------------------------|----------------------------------------|
| CotAD_73221            | The previously reported gene           |
| CotAD_73692            | The previously reported gene           |
| CotAD_74529            | The previously reported gene           |
| CotAD_74851            | The previously reported gene           |
| CotAD_74952            | The previously reported gene           |
| CotAD_74978            | The previously reported gene           |
| CotAD_75003            | The previously reported gene           |
| CotAD_75313            | The previously reported gene           |
| CotAD_75563            | The previously reported gene           |
| CotAD_76113            | The previously reported gene           |
| CotAD_76165            | The previously reported gene           |
| CotAD_76654            | The previously reported gene           |
| CotAD_76868            | The previously reported gene           |
| CotAD_49525            | The previously reported protein        |
| Cotton_D_gene_10000638 | The previously reported protein        |
| CotAD_11036            | The previously reported protein        |
| CotAD_07844            | The previously reported protein        |
| CotAD_24342            | The previously reported protein        |
| TC251823               | The previously reported protein        |
| Cotton_D_gene_10017453 | The previously reported protein        |
| CotAD_42608            | The previously reported protein        |
| CotAD_51639            | The previously reported protein        |
| Cotton_D_gene_10017826 | The previously reported protein        |
| CotAD_21698            | The previously reported protein        |
| Cotton_A_11375         | The previously reported protein        |
| CotAD_09528            | The previously reported protein        |
| Cotton_D_gene_10008766 | The previously reported protein        |
| EV482881               | The previously reported protein        |
| CotAD_05159            | The previously reported phosphoprotein |
| CotAD_07377            | The previously reported phosphoprotein |
| CotAD_07810            | The previously reported phosphoprotein |
| CotAD_09667            | The previously reported phosphoprotein |
| CotAD_14342            | The previously reported phosphoprotein |
| CotAD_24069            | The previously reported phosphoprotein |
| CotAD_27572            | The previously reported phosphoprotein |
| CotAD_31803            | The previously reported phosphoprotein |
| CotAD_39741            | The previously reported phosphoprotein |
| CotAD_40275            | The previously reported phosphoprotein |
| CotAD_44190            | The previously reported phosphoprotein |
| CotAD_47595            | The previously reported phosphoprotein |
| CotAD_54943            | The previously reported phosphoprotein |
| CotAD_60172            | The previously reported phosphoprotein |
| CotAD_61595            | The previously reported phosphoprotein |
| CotAD_64492            | The previously reported phosphoprotein |

|                        |                                        |
|------------------------|----------------------------------------|
| CotAD_65328            | The previously reported phosphoprotein |
| CotAD_66948            | The previously reported phosphoprotein |
| CotAD_72377            | The previously reported phosphoprotein |
| Cotton_A_01216         | The previously reported phosphoprotein |
| Cotton_A_01339         | The previously reported phosphoprotein |
| Cotton_A_03692         | The previously reported phosphoprotein |
| Cotton_A_06948         | The previously reported phosphoprotein |
| Cotton_A_07472         | The previously reported phosphoprotein |
| Cotton_A_19569         | The previously reported phosphoprotein |
| Cotton_A_25396         | The previously reported phosphoprotein |
| Cotton_A_29925         | The previously reported phosphoprotein |
| Cotton_A_38233         | The previously reported phosphoprotein |
| Cotton_D_gene_10007707 | The previously reported phosphoprotein |
| Cotton_D_gene_10014636 | The previously reported phosphoprotein |
| Cotton_D_gene_10018388 | The previously reported phosphoprotein |
| Cotton_D_gene_10026593 | The previously reported phosphoprotein |
| Cotton_D_gene_10027878 | The previously reported phosphoprotein |
| Cotton_D_gene_10028753 | The previously reported phosphoprotein |
| Cotton_D_gene_10035684 | The previously reported phosphoprotein |
| Cotton_D_gene_10040894 | The previously reported phosphoprotein |
| TC229918               | The previously reported phosphoprotein |
| Cotton_A_19478         | The previously reported phosphoprotein |
| Cotton_A_03590         | The previously reported phosphoprotein |
| CotAD_12923            | The previously reported phosphoprotein |
| TC247099               | The previously reported phosphoprotein |
| CotAD_44734            | The previously reported phosphoprotein |
| TC271223               | The previously reported phosphoprotein |
| CotAD_52648            | The previously reported phosphoprotein |
| CotAD_74126            | The previously reported phosphoprotein |
| Cotton_A_12625         | The previously reported phosphoprotein |
| CotAD_38392            | The previously reported phosphoprotein |
| CotAD_51219            | The previously reported phosphoprotein |
| CotAD_18320            | The previously reported phosphoprotein |
| CotAD_40997            | The previously reported phosphoprotein |
| TC233322               | The previously reported phosphoprotein |
| CotAD_50655            | The previously reported phosphoprotein |

---



**Supplementary Table S6.** Differentially phosphorylated protein motifs identified in this study.

| <b>NO</b> | <b>Motif</b>  | <b>Special for DEPs or not</b> | <b>Found in other species</b> | <b>Motif pattern</b> | <b>Motif category</b> |
|-----------|---------------|--------------------------------|-------------------------------|----------------------|-----------------------|
| 1         | .....SP.....  | No                             | Yes                           | sP                   | Pro-directed          |
| 2         | .....DSD..... | No                             | Yes                           | [D/E]s               | Acidic                |
| 3         | .....SD.E...  | No                             | Yes                           | sXX[D/E]             | Acidic                |
| 4         | .....S.SD...  | Special                        | Novel                         | sXX[D/E]             | Acidic                |
| 5         | .....DS.....  | Special                        | Yes                           | [D/E]s               | Acidic                |
| 6         | .....S.D....  | No                             | Yes                           | sX[D/E]              | Acidic                |
| 7         | .....SD.....  | No                             | Novel                         | s[D/E]               | Acidic                |
| 8         | ...R..S.....  | No                             | Yes                           | RXXs                 | Basic                 |
| 9         | .....SE.....  | No                             | Yes                           | s[D/E]               | Acidic                |
| 10        | .....TP...P.  | No                             | Novel                         | Unclear              | Unclear               |
| 11        | .....TP.....  | No                             | Yes                           | Unclear              | Unclear               |
| 12        | .....TD.....  | No                             | Novel                         | Unclear              | Unclear               |
| 13        | .....TSD....  | No                             | Yes                           | Unclear              | Unclear               |
| 14        | ...S..T.....  | Special                        | Yes                           | Unclear              | Unclear               |

**Supplementary Table S7.** The primer sequences list and gene expression profiles following RNA-Seq and qRT-PCR.

| Gene list   | Forward              | Reverse               | RNA-Seq(Expression) |           | qRT-PCR (Expression) |           |
|-------------|----------------------|-----------------------|---------------------|-----------|----------------------|-----------|
|             |                      |                       | -3_WT:-3_fl         | 0_WT:0_fl | -3_WT:-3_fl          | 0_WT:0_fl |
| CotAD_35784 | AGACTCGCCATTGCTGCTC  | ATAATCCGGCCACAAACCA   | 3.05                | 4.2       | 2.5                  | 9.65      |
| CotAD_60970 | ACTTGCCTTACGGGATTGA  | CCAGTTGCTGTCCGGTCTC   | 8.3                 | 9.3       | 3.5                  | 6.87      |
| CotAD_68165 | CATCAGTGGAGCAAAGGGTC | GGTAGGAGCAATGGCAGGA   | 2.01                | 2.3       | 2.6                  | 6.72      |
| CotAD_13206 | GGTATTCGGACACGTTAATG | AAGACAGAAGAACCAGATGG  |                     | 4.17      |                      | 5.5       |
| CotAD_52285 | ATAGCGAAACCGACTACCC  | GCTGAGCAACGGCACATAA   |                     | 2.38      |                      | 4.26      |
| CotAD_07889 | GACCCAACAGTTCCCAACC  | GGACACCTTCCCATCTTTC   | 1.37                | 1.22      | 1.67                 | 4         |
| CotAD_42040 | TAACCCGAGTTTACGAGGAT | AGGCGAGTGAAGTTCTACCAT | -3.1                | -2.69     | 0.25                 | 0.429     |
| CotAD_12714 | TTGCTGCTCAATTCTTGGA  | AGGACTTGCTTCACTAGGA   | -2.6                |           | 0.12                 |           |
| CotAD_22057 | GCAGGATGTTGAAGATGG   | CCCAATTAAGAGAAAGAGGA  | -1.59               |           | 0.58                 |           |
